# Supplementary material for: Reported antibiotic use among patients in the multicenter ANDEMIA infectious diseases surveillance study in sub-saharan Africa
Source: PubMed Central journal article supplement (PMC10809765; doi:10.1186/s13756-024-01365-w), 2024-01-25
Supplement: 13756_2024_1365_MOESM3_ESM.pdf [file 13756_2024_1365_MOESM3_ESM.pdf]

## Additional file 3

Question on antibiotics use, ANDEMIA case investigation form

### Current treatment (prior to enrolment)

Please indicate any **treatment** taken in the **last 10 days** (other than malaria treatment, ART or TB treatment listed before). **Do NOT list medications prescribed at current consultation/admission unless they have been taken before the collection of ANDEMIA samples.**

27. Is/has the patient taken any **antibiotics**? Yes  No

If **YES**, please specify below: (if **NO**, go to 28):

\_\_\_\_\_ date **last dose** taken: //20 (DD/MM/20YY)

AMX=Amoxicilline; AMP=Ampicilline; AMC=Augmentin (Amoxicilline+Ac clavu.); CTX= Cefotaxime ;  
CFM=Cefixime; CIP=Ciprofloxacin; CLI=Clindamycine; CRO=Ceftriaxone; DOX=Doxycycline;  
ERY=Erythromycine; GEN=Gentamycine ; OFX=Ofloxacin ; PEN=Pénicilline; SXT=Cotrimoxazole;  
VAN=Vancomycine; Other (please specify in full above)
