# Supplementary material for: Reported antibiotic use among patients in the multicenter ANDEMIA infectious diseases surveillance study in sub-saharan Africa
Source: PubMed Central journal article supplement (PMC10809765; doi:10.1186/s13756-024-01365-w), 2024-01-25
Supplement: 13756_2024_1365_MOESM6_ESM.pdf [file 13756_2024_1365_MOESM6_ESM.pdf]

## Additional file 6

Table: Characteristics of ANDEMIA case-patients enrolled from 1 February 2018 till 26 May 2022 by country

|                                   | Country             |       |                            |       |                           |       |                       |       |                                |       |
|-----------------------------------|---------------------|-------|----------------------------|-------|---------------------------|-------|-----------------------|-------|--------------------------------|-------|
|                                   | Total<br>(N=19,700) |       | Côte d'Ivoire<br>(N=5,529) |       | Burkina Faso<br>(N=4,802) |       | DR Congo<br>(N=5,937) |       | Rep. South Africa<br>(N=3,432) |       |
|                                   | n                   | %     | n                          | %     | n                         | %     | n                     | %     | n                              | %     |
| <b>Syndrome</b>                   |                     |       |                            |       |                           |       |                       |       |                                |       |
| AFDUC                             | 7,203               | 36.6% | 2,247                      | 40.6% | 1,784                     | 37.2% | 2,110                 | 35.5% | 1,062                          | 30.9% |
| GI                                | 5,085               | 25.8% | 1,392                      | 25.2% | 1,334                     | 27.8% | 1,382                 | 23.3% | 977                            | 28.5% |
| RTI                               | 6,676               | 33.9% | 1,820                      | 32.9% | 1,576                     | 32.8% | 2,075                 | 35.0% | 1,205                          | 35.1% |
| GI and RTI                        | 736                 | 3.7%  | 70                         | 1.3%  | 108                       | 2.2%  | 370                   | 6.2%  | 188                            | 5.5%  |
| <b>COVID-19 pandemic</b>          |                     |       |                            |       |                           |       |                       |       |                                |       |
| Enrolled before                   | 10,604              | 53.8% | 3,392                      | 61.3% | 2,047                     | 42.6% | 3,238                 | 54.5% | 1,927                          | 56.1% |
| Enrolled during                   | 9,096               | 46.2% | 2,137                      | 38.7% | 2,755                     | 57.4% | 2,699                 | 45.5% | 1,505                          | 43.9% |
| <b>Health facility</b>            |                     |       |                            |       |                           |       |                       |       |                                |       |
| Rural site                        | 7,173               | 36.4% | 2,010                      | 36.4% | 1,999                     | 41.6% | 1,657                 | 27.9% | 1,507                          | 43.9% |
| Urban site                        | 12,527              | 63.6% | 3,519                      | 63.6% | 2,803                     | 58.4% | 4,280                 | 72.1% | 1,925                          | 56.1% |
| <b>Patient's residence *</b>      |                     |       |                            |       |                           |       |                       |       |                                |       |
|                                   | N=19,617            |       | N=5,529                    |       | N=4,770                   |       | N=5,936               |       | N=3,382                        |       |
| Village                           | 8,624               | 44.0% | 2,083                      | 37.7% | 3,104                     | 65.1% | 1,954                 | 32.9% | 1,483                          | 43.9% |
| City/Town                         | 10,993              | 56.0% | 3,446                      | 62.3% | 1,666                     | 34.9% | 3,982                 | 67.1% | 1,899                          | 56.1% |
| <b>Age group*</b>                 |                     |       |                            |       |                           |       |                       |       |                                |       |
|                                   | N=19,544            |       | N=5,517                    |       | N=4,783                   |       | N=5,925               |       | N=3,319                        |       |
| <1 year                           | 4,297               | 22.0% | 675                        | 12.2% | 1,064                     | 22.2% | 1,477                 | 24.9% | 1,081                          | 32.6% |
| 1-4 years                         | 6,128               | 31.4% | 1,492                      | 27.0% | 1,573                     | 32.9% | 1,952                 | 32.9% | 1,111                          | 33.5% |
| 5-17 years                        | 2,518               | 12.9% | 825                        | 15.0% | 395                       | 8.3%  | 1,075                 | 18.1% | 223                            | 6.7%  |
| 18-44 years                       | 4,067               | 20.8% | 1,687                      | 30.6% | 956                       | 20.0% | 868                   | 14.6% | 556                            | 16.8% |
| ≥45 years                         | 2,534               | 13.0% | 838                        | 15.2% | 795                       | 16.6% | 553                   | 9.3%  | 348                            | 10.5% |
| <b>Sex*</b>                       |                     |       |                            |       |                           |       |                       |       |                                |       |
|                                   | N=19,672            |       | N=5,528                    |       | N=4,790                   |       | N=5,936               |       | N=3,418                        |       |
| Male                              | 10,116              | 51.4% | 2,643                      | 47.8% | 2,706                     | 56.5% | 2,985                 | 50.3% | 1,782                          | 52.1% |
| Female                            | 9,556               | 48.6% | 2,885                      | 52.2% | 2,084                     | 43.5% | 2,951                 | 49.7% | 1,636                          | 47.9% |
| <b>Level of education *</b>       |                     |       |                            |       |                           |       |                       |       |                                |       |
|                                   | N=19,625            |       | N=5,529                    |       | N=4,770                   |       | N=5,933               |       | N=3,393                        |       |
| None                              | 7,092               | 36.1% | 2,987                      | 54.0% | 3,166                     | 66.4% | 876                   | 14.8% | 63                             | 1.9%  |
| ≤6 years                          | 3,852               | 19.6% | 998                        | 18.1% | 871                       | 18.3% | 1,737                 | 29.3% | 246                            | 7.3%  |
| 7-10 years                        | 4,136               | 21.1% | 710                        | 12.8% | 489                       | 10.3% | 2,061                 | 34.7% | 876                            | 25.8% |
| >10 years                         | 4,545               | 23.2% | 834                        | 15.1% | 244                       | 5.1%  | 1,259                 | 21.2% | 2,208                          | 65.1% |
| <b>Employment*</b>                |                     |       |                            |       |                           |       |                       |       |                                |       |
|                                   | N=19,331            |       | N=5,465                    |       | N=4,584                   |       | N=5,911               |       | N=3,371                        |       |
| Unemployed                        | 8,819               | 45.6% | 2,381                      | 43.6% | 820                       | 17.9% | 3,250                 | 55.0% | 2,368                          | 70.2% |
| Self-employed                     | 6,912               | 35.8% | 2,163                      | 39.6% | 3,051                     | 66.6% | 1,609                 | 27.2% | 89                             | 2.6%  |
| Part time employed                | 966                 | 5.0%  | 139                        | 2.5%  | 201                       | 4.4%  | 435                   | 7.4%  | 191                            | 5.7%  |
| Full time employed                | 2,634               | 13.6% | 782                        | 14.3% | 512                       | 11.2% | 617                   | 10.4% | 723                            | 21.4% |
| <b>Hospitalized at enrolment‡</b> |                     |       |                            |       |                           |       |                       |       |                                |       |
|                                   | N=11,168            |       | N=1,334                    |       | N=3,394                   |       | N=3,128               |       | N=3,312                        |       |
| No                                | 159                 | 1.4%  | 8                          | 0.6%  | 124                       | 3.7%  | 25                    | 0.8%  | 2                              | 0.1%  |
| Yes                               | 11,009              | 98.6% | 1,326                      | 99.4% | 3,270                     | 96.4% | 3,103                 | 99.2% | 3,310                          | 99.9% |

Legend: AFDUC: acute febrile disease of unknown cause; GI: gastrointestinal infection; RTI: respiratory tract infection; DR Congo: Democratic Republic of the Congo; Rep. South Africa: Democratic Republic of South Africa; \*Variables with missing data <5%. ‡Missing data exceeds 5%.
