# Supplementary material for: Reported antibiotic use among patients in the multicenter ANDEMIA infectious diseases surveillance study in sub-saharan Africa
Source: PubMed Central journal article supplement (PMC10809765; doi:10.1186/s13756-024-01365-w), 2024-01-25
Supplement: 13756_2024_1365_MOESM11_ESM.pdf [file 13756_2024_1365_MOESM11_ESM.pdf]

## Additional file 11

Table: Number of different antibiotic substances reported in the ANDEMIA study by country and by location.

| Country | Location | Number of different antibiotics reported | parenteral | oral | parenteral/oral/other |
|---------|----------|------------------------------------------|------------|------|-----------------------|
| CIV     | Urban    | 21                                       | 5          | 5    | 11                    |
|         | Rural    | 14                                       | 2          | 4    | 8                     |
| BF      | Urban    | 20                                       | 7          | 3    | 10                    |
|         | Rural    | 14                                       | 4          | 1    | 9                     |
| DRC     | Urban    | 37                                       | 12         | 10   | 15                    |
|         | Rural    | 14                                       | 4          | 2    | 8                     |
| RSA     | Urban    | 25                                       | 9          | 4    | 12                    |
|         | Rural    | 17                                       | 6          | 2    | 9                     |

Legend: CIV: Côte d'Ivoire; BF: Burkina Faso; DRC: Democratic Republic of the Congo; RSA: Republic of South Africa.
